# Supplementary material for: A Mathematical Model of Mitotic Exit in Budding Yeast: The Role of Polo Kinase
Source: PubMed Central journal article supplement (PMC3285609; doi:10.1371/journal.pone.0030810), 2012-02-23
Supplement: pone.0030810.s001.pdf [file pone.0030810.s001.pdf]

**Table S1: Equations of the Model**

$$\frac{d[\text{Clb2}]}{dt} = k_{s,b2} - V_{d,b2} \cdot [\text{Clb2}]$$

$$\frac{d[\text{Cdc20}]}{dt} = k_{s,20} - V_{d,20} \cdot [\text{Cdc20}]$$

$$\frac{d[\text{Cdh1}]}{dt} = \frac{V_{a,cdh} \cdot ([\text{Cdh1}]_T - [\text{Cdh1}])}{J_{a,cdh} + ([\text{Cdh1}]_T - [\text{Cdh1}])} - \frac{V_{i,cdh} \cdot [\text{Cdh1}]}{J_{i,cdh} + [\text{Cdh1}]}$$

$$\frac{d[\text{Pds1}]}{dt} = k_{s,pds} - V_{d,pds} \cdot [\text{Pds1}] - l_{as,pds} \cdot [\text{Pds1}] \cdot [\text{Esp1}] + l_{d,pds} \cdot [\text{PE}] + k_{d,esp} \cdot [\text{PE}]$$

$$\frac{d[\text{Esp1}]}{dt} = -l_{as,pds} \cdot [\text{Pds1}] \cdot [\text{Esp1}] + l_{d,pds} \cdot [\text{PE}] + k_{s,esp} - k_{d,esp} \cdot [\text{Esp1}] + V_{d,pds} \cdot [\text{PE}]$$

$$\frac{d[\text{PE}]}{dt} = l_{as,pds} \cdot [\text{Pds1}] \cdot [\text{Esp1}] - l_{d,pds} \cdot [\text{PE}] - V_{d,pds} \cdot [\text{PE}] - k_{d,esp} \cdot [\text{PE}]$$

$$\frac{d[\text{Poloi}]}{dt} = k_{s,polo} - V_{d,polo} \cdot [\text{Poloi}] - \frac{V_{a,polo} \cdot [\text{Poloi}]}{J_{a,polo} + [\text{Poloi}]} + \frac{k_{i,polo} \cdot [\text{Polo}]}{J_{i,polo} + [\text{Polo}]}$$

$$\frac{d[\text{Polo}]}{dt} = \frac{V_{a,polo} \cdot [\text{Poloi}]}{J_{a,polo} + [\text{Poloi}]} - \frac{k_{i,polo} \cdot [\text{Polo}]}{J_{i,polo} + [\text{Polo}]} - V_{d,polo} \cdot [\text{Polo}]$$

$$\frac{d[\text{Tem1a}]}{dt} = -l_{a,men} \cdot [\text{Tem1a}] \cdot [\text{Cdc15a}] + l_{d,men} \cdot [\text{MEN}] + \frac{V_{a,tem} \cdot [\text{Tem1i}]}{J_{tem} + [\text{Tem1i}]} - \frac{V_{i,tem} \cdot [\text{Tem1a}]}{J_{tem} + [\text{Tem1a}] + [\text{MEN}]} + \frac{V_{i,c15} \cdot [\text{MEN}]}{J_{c15} + [\text{Cdc15a}] + [\text{MEN}]}$$

$$\frac{d[\text{Cdc15a}]}{dt} = -l_{a,men} \cdot [\text{Tem1a}] \cdot [\text{Cdc15a}] + l_{d,men} \cdot [\text{MEN}] + \frac{V_{i,tem} \cdot [\text{MEN}]}{J_{tem} + [\text{Tem1a}] + [\text{MEN}]} + \frac{V_{a,c15} \cdot [\text{Cdc15i}]}{J_{c,15} + [\text{Cdc15i}]} - \frac{V_{i,c15} \cdot [\text{Cdc15a}]}{J_{c,15} + [\text{Cdc15a}] + [\text{MEN}]}$$

$$\frac{d[\text{MEN}]}{dt} = l_{a,men} \cdot [\text{Tem1a}] \cdot [\text{Cdc15a}] - l_{d,men} \cdot [\text{MEN}] - \frac{V_{i,tem} \cdot [\text{MEN}]}{J_{tem} + [\text{Tem1a}] + [\text{MEN}]} - \frac{V_{i,c15} \cdot [\text{MEN}]}{J_{c,15} + [\text{Cdc15a}] + [\text{MEN}]}$$

$$\frac{d[\text{Cdc14}]}{dt} = -l_{a,1} \cdot [\text{Cdc14}] \cdot [\text{Net1}] + l_{d,1} \cdot [\text{RENT}] - l_{a,2} \cdot [\text{Cdc14}] \cdot [\text{Net1P}] + l_{d,2} \cdot [\text{RENTP}] - l_{a,3} \cdot [\text{Cdc14}] \cdot [\text{PNet1}] + l_{d,3} \cdot [\text{PRENT}] - l_{a,4} \cdot [\text{Cdc14}] \cdot [\text{PNet1P}] + l_{d,4} \cdot [\text{PRENTP}]$$

$$\frac{d[\text{Net1}]}{dt} = -l_{a,1} \cdot [\text{Cdc14}] \cdot [\text{Net1}] + l_{d,1} \cdot [\text{RENT}] - \frac{V_{k,12} \cdot [\text{Net1}]}{J_{12} + [\text{Net1}] + [\text{RENT}]} + \frac{V_{p,21} \cdot [\text{Net1P}]}{J_{12} + [\text{Net1P}] + [\text{RENTP}]} - \frac{V_{k,13} \cdot [\text{Net1}]}{J_{13} + [\text{Net1}] + [\text{RENT}]} + \frac{V_{p,31} \cdot [\text{PNet1}]}{J_{13} + [\text{PNet1}] + [\text{PRENT}]}$$

$$\frac{d[\text{PNet1}]}{dt} = -l_{a,3} \cdot [\text{Cdc14}] \cdot [\text{PNet1}] + l_{d,3} \cdot [\text{PRENT}] - \frac{V_{k,34} \cdot [\text{PNet1}]}{J_{34} + [\text{PNet1}] + [\text{PRENT}]} + \frac{V_{p,43} \cdot [\text{PNet1P}]}{J_{34} + [\text{PNet1P}] + [\text{PRENTP}]} + \frac{V_{k,13} \cdot [\text{Net1}]}{J_{13} + [\text{Net1}] + [\text{RENT}]} - \frac{V_{p,31} \cdot [\text{PNet1}]}{J_{13} + [\text{PNet1}] + [\text{PRENT}]}$$

$$\frac{d[\text{PNet1P}]}{dt} = -l_{a,4} \cdot [\text{Cdc14}] \cdot [\text{PNet1P}] + l_{d,4} \cdot [\text{PRENTP}] + \frac{V_{k,34} \cdot [\text{PNet1}]}{J_{34} + [\text{PNet1}] + [\text{PRENT}]} - \frac{V_{p,43} \cdot [\text{PNet1P}]}{J_{34} + [\text{PNet1P}] + [\text{PRENTP}]} + \frac{V_{k,24} \cdot [\text{Net1P}]}{J_{24} + [\text{Net1P}] + [\text{RENTP}]} - \frac{V_{p,42} \cdot [\text{PNet1P}]}{J_{24} + [\text{PNet1P}] + [\text{PRENTP}]}$$

$$\frac{d[\text{RENT}]}{dt} = l_{a,1} \cdot [\text{Cdc14}] \cdot [\text{Net1}] - l_{d,1} \cdot [\text{RENT}] - \frac{V_{k,12} \cdot [\text{RENT}]}{J_{12} + [\text{Net1}] + [\text{RENT}]} + \frac{V_{p,21} \cdot [\text{RENTP}]}{J_{12} + [\text{Net1P}] + [\text{RENTP}]} - \frac{V_{k,13} \cdot [\text{RENT}]}{J_{13} + [\text{Net1}] + [\text{RENT}]} + \frac{V_{p,31} \cdot [\text{PRENT}]}{J_{13} + [\text{PNet1}] + [\text{PRENT}]}$$

$$\frac{d[\text{PRENT}]}{dt} = l_{a,3} \cdot [\text{Cdc14}] \cdot [\text{PNet1}] - l_{d,3} \cdot [\text{PRENT}] - \frac{V_{k,34} \cdot [\text{PRENT}]}{J_{34} + [\text{PNet1}] + [\text{PRENT}]} + \frac{V_{p,43} \cdot [\text{PRENTP}]}{J_{34} + [\text{PNet1P}] + [\text{PRENTP}]} + \frac{V_{k,13} \cdot [\text{RENT}]}{J_{13} + [\text{Net1}] + [\text{RENT}]} - \frac{V_{p,31} \cdot [\text{PRENT}]}{J_{13} + [\text{PNet1}] + [\text{PRENT}]}$$

$$\frac{d[\text{PRENTP}]}{dt} = l_{a,4} \cdot [\text{Cdc14}] \cdot [\text{PNet1P}] - l_{d,4} \cdot [\text{PRENTP}] - \frac{V_{k,34} \cdot [\text{PRENT}]}{J_{34} + [\text{PNet1}] + [\text{PRENT}]} + \frac{V_{p,43} \cdot [\text{PRENTP}]}{J_{34} + [\text{PNet1P}] + [\text{PRENTP}]} + \frac{V_{k,24} \cdot [\text{RENTP}]}{J_{24} + [\text{Net1P}] + [\text{RENTP}]} - \frac{V_{p,42} \cdot [\text{PRENTP}]}{J_{24} + [\text{PNet1P}] + [\text{PRENTP}]}$$

$$[\text{CDK}] = \frac{[\text{Clb2}]}{1.0 + \text{INH}}$$

$$[\text{PP2A}] = \frac{1.0 + k_{pp} \cdot ki \cdot [\text{ACTEsp1}]}{1.0 + ki \cdot [\text{ACTEsp1}]} \cdot \text{PP2AT}$$

$$S = \exp((-ks) * (t - tm)) * (1.0 - N) * C * (1.0 - \text{SCRRDD})$$

$$V_{d,b2} = k_{d,b2} + k_{d,b2'} \cdot [\text{Cdc20}] + k_{d,b2''} \cdot [\text{Cdh1}]$$

$$V_{d,20} = k_{d,20} + k_{d,20'} \cdot [\text{Cdh1}]$$

$$V_{i,cdh} = k_{k,cdh} + k_{k,cdh'} \cdot [\text{CDK}]$$

$$V_{a,cdh} = k_{p,cdh} + k_{p,cdh'} \cdot [\text{ACTCdc14}]$$

$$V_{d,pds} = k_{d,pds} + k_{d,pds'} \cdot [\text{Cdc20}]$$

$$V_{a,polo} = k_{a,polo} + k_{a,polo'} \cdot [\text{CDK}]$$

$$V_{d,polo} = k_{d,polo} + k_{d,polo'} \cdot [\text{Cdh1}]$$

$$V_{a,tem} = k_{a,tem} + k_{a,tem'} \cdot [\text{ACTPOLO}] + k_{a,tem''} \cdot S \cdot [\text{ACTPOLO}]$$

$$V_{i,tem} = k_{i,tem} + k_{i,tem'} \cdot [\text{ACTPP2A}] + k_{i,tem''} \cdot [\text{ACTCdc14}]$$

$$V_{a,c15} = k_{a,c15} + k_{a,c15'} \cdot [\text{ACTCdc14}]$$

$$V_{i,c15} = k_{i,c15} + k_{i,c15'} \cdot [\text{CDK}]$$

$$V_{k,12} = k_{k,12} \cdot [\text{CDK}]$$

$$V_{p,21} = k_{p,21} \cdot [\text{ACTPP2A}] + k_{p,21'} \cdot [\text{ACTCdc14}]$$

$$V_{k,34} = k_{k,34} \cdot [\text{CDK}]$$

$$V_{p,43} = k_{p,43} \cdot [\text{ACTPP2A}] + k_{p,43'} \cdot [\text{ACTCdc14}]$$

$$V_{k,13} = k_{k,13} \cdot \text{effc15} \cdot [\text{CDC15a}] + k_{k,13'} \cdot [\text{ACTPOLO}] + k_{k,13''} \cdot [\text{ACTMEN}]$$

$$V_{p,31} = k_{p,31} \cdot [\text{ACTPP2A}] + k_{p,31'} \cdot [\text{ACTCdc14}]$$

$$V_{k,24} = k_{k,24} \cdot [\text{ACTPOLO}] + k_{k,24'} \cdot [\text{ACTMEN}]$$

$$V_{p,42} = k_{p,42} \cdot [\text{ACTPP2A}] + k_{p,42'} \cdot [\text{ACTCdc14}]$$

$$[\text{PDS1T}] = [\text{PDS1}] + [\text{PE}]$$

$$[\text{Esp1T}] = [\text{Esp1}] + [\text{PE}]$$

$$[\text{ACTCdc14}] = \text{effc14} \cdot [\text{Cdc14}]$$

$$\text{ACTMEN} = \text{effc15} \cdot [\text{MEN}]$$

$$[\text{ACTPOLO}] = \text{effpol} \cdot [\text{POLO}]$$

$$[\text{ACTEsp1}] = \text{effesp} \cdot [\text{Esp1}]$$

$$[\text{ACTPP2A}] = \text{effppa} \cdot [\text{PP2A}]$$
