# Supplementary material for: A Mathematical Model of Mitotic Exit in Budding Yeast: The Role of Polo Kinase
Source: PubMed Central journal article supplement (PMC3285609; doi:10.1371/journal.pone.0030810), 2012-02-23
Supplement: pone.0030810.s002.pdf [file pone.0030810.s002.pdf]

**Table S2: Basal parameter values for the wild-type cells**

|                     |                     |                   |
|---------------------|---------------------|-------------------|
| $k_{s,b2} = 0.03$   | $J_{polo} = 0.25$   | $k_{p,43'} = 0.2$ |
| $INH = 0$           | $k_{a,tem} = 0$     | $J_{34} = 1$      |
| $k_{d,b2} = 0.03$   | $k_{a,tem'} = 2.8$  | $k_{k,13} = 0.4$  |
| $k_{d,b2'} = 0.25$  | $k_{a,tem''} = 13$  | $k_{k,13'} = 2.3$ |
| $k_{d,b2''} = 3$    | $k_{i,tem} = 0.35$  | $k_{k,13''} = 35$ |
| $kpp = 0.1$         | $k_{i,tem'} = 4.5$  | $k_{p,31} = 2.6$  |
| $ki = 20$           | $k_{i,tem''} = 2.8$ | $k_{p,31'} = 15$  |
| $PP2AT = 1$         | $J_{tem} = 0.05$    | $J_{13} = 0.1$    |
| $k_{s,20} = 0$      | $l_{a,men} = 15$    | $k_{k,24} = 5.5$  |
| $k_{d,20} = 0.05$   | $l_{d,men} = 0.1$   | $k_{k,24'} = 35$  |
| $k_{d,20'} = 1.5$   | $k_{a,c15} = 0$     | $k_{p,42} = 3.8$  |
| $J_{c,dh} = 0.001$  | $k_{a,c15'} = 1.5$  | $k_{p,42'} = 3$   |
| $k_{p,cdh} = 0.035$ | $k_{i,c15} = 0$     | $J_{24} = 0.05$   |
| $k_{p,cdh'} = 1.2$  | $k_{i,c15'} = 0.09$ | $Cdh1T = 1$       |
| $k_{k,cdh} = 0$     | $J_{c15} = 0.2$     | $Tem1T = 1$       |
| $k_{k,cdh'} = 1.22$ | $l_{a,1} = 300$     | $Cdc15T = 1$      |
| $k_{s,pds} = 0.03$  | $l_{d,1} = 1$       | $Cdc14T = 1$      |
| $k_{d,pds} = 0.03$  | $l_{a,2} = 10$      | $NET1T = 2$       |

|                       |                  |               |
|-----------------------|------------------|---------------|
| $k_{d,pds'} = 2$      | $l_{d,2} = 0.2$  | $C = 0$       |
| $l_{a,pds} = 500$     | $l_{a,3} = 1$    | $S = 0$       |
| $l_{d,pds} = 1$       | $l_{d,3} = 4$    | $N = 0$       |
| $k_{s,esp} = 0.0013$  | $l_{a,4} = 1$    | $k_s = 0$     |
| $k_{d,esp} = 0.004$   | $l_{d,4} = 1$    | $t_m = 0$     |
| $k_{s,polo} = 0.01$   | $k_{k,12} = 1$   | $effc14 = 1$  |
| $k_{d,polo} = 0.01$   | $k_{p,21} = 40$  | $effc15 = 1$  |
| $k_{d,polo'} = 0.15$  | $k_{p,21'} = 5$  | $effpol = 1$  |
| $k_{a,polo} = 0.0065$ | $J_{12} = 2$     | $effppa = 1$  |
| $k_{a,polo'} = 0.09$  | $k_{k,34} = 2$   | $effesp = 1$  |
| $k_{i,polo} = 0.035$  | $k_{p,43} = 0.6$ | $SCCRRDD = 0$ |
