# Supplementary material for: A Mathematical Model of Mitotic Exit in Budding Yeast: The Role of Polo Kinase
Source: PubMed Central journal article supplement (PMC3285609; doi:10.1371/journal.pone.0030810), 2012-02-23
Supplement: pone.0030810.s003.pdf [file pone.0030810.s003.pdf]

**Table S3: Initial values of model variables**

|                 |                  |                 |                 |
|-----------------|------------------|-----------------|-----------------|
| [Clb2] = 0.996  | [Tem1a] = 0.044  | [POLO] = 0.852  | [Cdc14] = 0.005 |
| [Cdc20] = 0     | [Cdc15a] = 0.014 | [PRENTP] = 0.02 | [PRENT] = 0.062 |
| [Cdh1] = 3.4E-5 | [MEN] = 1.9E-4   | [Pds1] = 0.675  | [PNet1] = 0.099 |
| [Esp1] = 9.9E-4 | [Net1] = 0.829   | [PE] = 0.324    | [RENT] = 0.899  |
| [POLOi] = 0.146 | [PNet1P] = 0.051 |                 |                 |
