# Supplementary material for: A Mathematical Model of Mitotic Exit in Budding Yeast: The Role of Polo Kinase
Source: PLoS One. 2012 Feb 23;7(2):e30810. doi: 10.1371/journal.pone.0030810 (PMC3285609; doi:10.1371/journal.pone.0030810)
Supplement: Text S3 — MitoticExit.ode. (ODE) [file pone.0030810.s006.ode]

#This file (MitoticExit.ode) is suitable for use for XPP and WINPP.It can be downloaded 
#at PLoS ONE website or model webpage (http://mpf.biol.vt.edu/research/mitotic_exit_model/pp/).
# XPP can be downloaded from http://www.math.pitt.edu/~bard/xpp/download.html 
# WinPP.zip can be downloaded from http://www.math.pitt.edu/~bard/bardware/ 
 

#Functions


Mass_Act(k1)=k1

Mass_0001(k1,S1)=k1 * S1

Mass_0002(k1,S1,S2)=k1 * S1 * S2

Michaelis(M1,J1,k1,S1)=k1 * S1 * M1 / (J1 + S1)


#Variables


CDK=CLB2/(1.0+INH)

aux CDK=CDK

PP2A=(1.0+kpp*ki*ESP1)/(1.0+ki*ESP1)*PP2AT

aux PP2A=PP2A

ACTCDC14=effc14*CDC14

aux ACTCDC14=ACTCDC14

ACTMEN=effc15*MEN

aux ACTMEN=ACTMEN

ACTPOLO=effpol*POLO

aux ACTPOLO=ACTPOLO

ACTESP1=effesp*ESP1

aux ACTESP1=ACTESP1

ACTPP2A=effppa*PP2A

aux ACTPP2A=ACTPP2A

PDS1T=PDS1+PE

aux PDS1T=PDS1T

ESP1T=ESP1+PE

aux ESP1T=ESP1T

Vdb2=kdb2+kdb2_p*CDC20+kdb2_pp*CDH1

aux Vdb2=Vdb2

Vd20=kd20+kd20_p*CDH1

aux Vd20=Vd20

Vpcdh=kpcdh+kpcdh_p*ACTCDC14

aux Vpcdh=Vpcdh

Vkcdh=kkcdh+kkcdh_p*CDK

aux Vkcdh=Vkcdh

Vdpds=kdpds+kdpds_p*CDC20

aux Vdpds=Vdpds

Vapolo=kapolo+kapolo_p*CDK

aux Vapolo=Vapolo

Vdpolo=kdpolo+kdpolo_p*CDH1

aux Vdpolo=Vdpolo

Vatem=katem+katem_p*ACTPOLO+katem_pp*S*ACTPOLO

aux Vatem=Vatem

Vitem=kitem+kitem_p*ACTPP2A+kitem_pp*ACTCDC14

aux Vitem=Vitem

Vac15=kac15+kac15_p*ACTCDC14

aux Vac15=Vac15

Vic15=kic15+kic15_p*CDK

aux Vic15=Vic15

Vk12=kk12*CDK

aux Vk12=Vk12

Vp21=kp21*ACTPP2A+kp21_p*ACTCDC14

aux Vp21=Vp21

Vk34=kk34*CDK

aux Vk34=Vk34

Vp43=kp43*ACTPP2A+kp43_p*ACTCDC14

aux Vp43=Vp43

Vk13=kk13*effc15*CDC15f+kk13_p*ACTPOLO+kk13_pp*ACTMEN

aux Vk13=Vk13

Vp31=kp31*ACTPP2A+kp31_p*ACTCDC14

aux Vp31=Vp31

Vk24=kk24*ACTPOLO+kk24_p*ACTMEN

aux Vk24=Vk24

Vp42=kp42*ACTPP2A+kp42_p*ACTCDC14

aux Vp42=Vp42

GAIN_N12=Vk12*NET1/(J12+NET1+RENT)-Vp21*NET1P/(J12+NET1P+RENTP)

aux GAIN_N12=GAIN_N12

GAIN_R12=Vk12*RENT/(J12+NET1+RENT)-Vp21*RENTP/(J2+NET1P+RENTP)

aux GAIN_R12=GAIN_R12
GAIN_N24=Vk24*NET1P/(J24+NET1P+RENTP)-Vp42*PNET1P/(J24+PNET1P+PRENTP)

aux GAIN_N24=GAIN_N24
GAIN_R24=Vk24*RENTP/(J24+NET1P+RENTP)-Vp42*PRENTP/(J24+PNET1P+PRENTP)

aux GAIN_R24=GAIN_R24
GAIN_N13=Vk13*NET1/(J13+NET1+RENT)-Vp31*PNET1/(J13+PNET1+PRENT)

aux GAIN_N13=GAIN_N13
GAIN_R13=Vk13*RENT/(J13+NET1+RENT)-Vp31*PRENT/(J13+PNET1+PRENT)

aux GAIN_R13=GAIN_R13
GAIN_N34=Vk34*PNET1/(J34+PNET1+PRENT)-Vp43*PNET1P/(J34+PNET1P+PRENTP)

aux GAIN_N34=GAIN_N34
GAIN_R34=Vk34*PRENT/(J34+PNET1+PRENT)-Vp43*PRENTP/(J34+PNET1P+PRENTP)

aux GAIN_R34=GAIN_R34
C14_GAIN=ld1*RENT-la1*CDC14*NET1

aux C14_GAIN=C14_GAIN

C14__0001=ld2*RENTP-la2*CDC14*NET1P

aux C14__0001=C14__0001

C14__0002=ld3*PRENT-la3*CDC14*PNET1

aux C14__0002=C14__0002

C14__0003=ld4*PRENTP-la4*CDC14*PNET1P

aux C14__0003=C14__0003


#Parameter Equations


S=exp((-ks)*(t-tm))*(1.0-N)*C*(1.0-SCCRRDD)*(1.0-TEV)


#Dependent Species


CDH1i=-(CDH1 - CDH1T)

aux CDH1i=CDH1i

TEM1i=-(MEN + TEM1f- TEM1T)

aux TEM1i=TEM1i

CDC15P=-(CDC15f + MEN - CDC15T)

aux CDC15P=CDC15
P
RENTP=-(CDC14 + PRENTP + PRENT + RENT - CDC14T)

aux RENTP=RENTP

NET1P=-(NET1 + PNET1P + PNET1 + RENT + RENTP + PRENT + PRENTP - NET1T)

aux NET1P=NET1P


#Independent Species


dCLB2/dt=(ksb2)-(Vdb2*CLB2)


dCDC20/dt=(ks20)-(Vd20*CDC20)


dCDH1/dt=(Vpcdh*CDH1i*1.0/(Jcdh+CDH1i))-(Vkcdh*CDH1*1.0/(Jcdh+CDH1))


dPDS1/dt=(kspds)-(Vdpds*PDS1)-(lapds*PDS1*ESP1)+(ldpds*PE)+(kdesp*PE)


dESP1/dt=-(lapds*PDS1*ESP1)+(ldpds*PE)+(ksesp)-(kdesp*ESP1)+(Vdpds*PE)


dPE/dt=(lapds*PDS1*ESP1)-(ldpds*PE)-(Vdpds*PE)-(kdesp*PE)


dPOLOi/dt=(kspolo)-(Vdpolo*POLOi)-(Vapolo*POLOi*1.0/(Jpolo+POLOi))+(kipolo*POLO*1.0/(Jpolo+POLO))


dPOLO/dt=(Vapolo*POLOi*1.0/(Jpolo+POLOi))-(kipolo*POLO*1.0/(Jpolo+POLO))-(Vdpolo*POLO)


dTEM1f/dt=-(lamen*TEM1f*CDC15f)+(ldmen*MEN)+((Vatem*TEM1i)/(Jtem+TEM1i))-(((Vitem*TEM1f)/((Jtem+TEM1f)+MEN)))+((Vic15*MEN)/((Jc15+CDC15f)+MEN))


dCDC15f/dt=-(lamen*TEM1f*CDC15f)+(ldmen*MEN)+((Vitem*MEN)/((Jtem+TEM1f)+MEN))+((Vac15*CDC15P)/(Jc15+CDC15P))-(((Vic15*CDC15f)/((Jc15+CDC15f)+MEN)))


dMEN/dt=(lamen*TEM1f*CDC15f)-(ldmen*MEN)-(((Vitem*MEN)/((Jtem+TEM1f)+MEN)))-(((Vic15*MEN)/((Jc15+CDC15f)+MEN)))


dCDC14/dt=-(la1*CDC14*NET1)+(ld1*RENT)-(la2*CDC14*NET1P)+(ld2*RENTP)-(la3*CDC14*PNET1)+(ld3*PRENT)-(la4*CDC14*PNET1P)+(ld4*PRENTP)


dNET1/dt=-(la1*CDC14*NET1)+(ld1*RENT)-(((Vk12*NET1)/((J12+NET1)+RENT)))+((Vp21*NET1P)/((J12+NET1P)+RENTP))-(((Vk13*NET1)/((J13+NET1)+RENT)))+((Vp31*PNET1)/((J13+PNET1)+PRENT))


dPNET1/dt=-(la3*CDC14*PNET1)+(ld3*PRENT)-(((Vk34*PNET1)/((J34+PNET1)+PRENT)))+((Vp43*PNET1P)/((J34+PNET1P)+PRENTP))+((Vk13*NET1)/((J13+NET1)+RENT))-(((Vp31*PNET1)/((J13+PNET1)+PRENT)))


dPNET1P/dt=-(la4*CDC14*PNET1P)+(ld4*PRENTP)+((Vk34*PNET1)/((J34+PNET1)+PRENT))-(((Vp43*PNET1P)/((J34+PNET1P)+PRENTP)))+((Vk24*NET1P)/((J24+NET1P)+RENTP))-(((Vp42*PNET1P)/((J24+PNET1P)+PRENTP)))


dRENT/dt=(la1*CDC14*NET1)-(ld1*RENT)-(((Vk12*RENT)/((J12+NET1)+RENT)))+((Vp21*RENTP)/((J12+NET1P)+RENTP))-(((Vk13*RENT)/((J13+NET1)+RENT)))+((Vp31*PRENT)/((J13+PNET1)+PRENT))


dPRENT/dt=(la3*CDC14*PNET1)-(ld3*PRENT)-(((Vk34*PRENT)/((J34+PNET1)+PRENT)))+((Vp43*PRENTP)/((J34+PNET1P)+PRENTP))+((Vk13*RENT)/((J13+NET1)+RENT))-(((Vp31*PRENT)/((J13+PNET1)+PRENT)))


dPRENTP/dt=(la4*CDC14*PNET1P)-(ld4*PRENTP)+((Vk34*PRENT)/((J34+PNET1)+PRENT))-(((Vp43*PRENTP)/((J34+PNET1P)+PRENTP)))+((Vk24*RENTP)/((J24+NET1P)+RENTP))-(((Vp42*PRENTP)/((J24+PNET1P)+PRENTP)))


#Globals


global 1 {ACTESP1 - 0.02 - 0.0} {C=1.0}

global 1 {CDH1 - 0.3 - 0.0} {ks=0.35;tm=t}


#Settings


init CDC14=0.00503936448776252

init CDC15f=0.0148701086633808

init CDC20=0.0

init CDH1=3.49063455127622E-5

init CLB2=0.996521507594501

init ESP1=9.91211370230943E-4

init MEN=1.96806785807901E-4

init NET1=0.829639785519212

init PDS1=0.675991211370232

init PE=0.324008788629769

init PNET1=0.0998617122889894

init PNET1P=0.0511977068475475

init POLO=0.852613658565677

init POLOi=0.146863020260077

init PRENT=0.0624298551487604

init PRENTP=0.0208870061061645

init RENT=0.899702260874976

init TEM1f=0.0448703043466323


#Parameter values 

param C=0.0

param CDC14T=1.0

param CDC15T=1.0

param CDH1T=1.0

param cell=1.0

param effc14=1.0

param effc15=1.0

param effesp=1.0

param effpol=1.0

param effppa=1.0

param INH=0.0

param J12=2.0

param J13=0.1

param J24=0.05

param J34=1.0

param Jc15=0.2

param Jcdh=0.0010

param Jpolo=0.25

param Jtem=0.05

param kac15=0.0

param kac15_p=1.5

param kapolo=0.0065

param kapolo_p=0.09

param katem=0.0

param katem_p=2.8

param katem_pp=13.0

param kd20=0.05

param kd20_p=1.5

param kdb2=0.03

param kdb2_p=0.25

param kdb2_pp=3.0

param kdesp=0.0040

param kdpds=0.03

param kdpds_p=2.0

param kdpolo=0.01

param kdpolo_p=0.15

param ki=20.0

param kic15=0.0

param kic15_p=0.09

param kipolo=0.035

param kitem=0.35

param kitem_p=4.5

param kitem_pp=2.8

param kk12=1.0

param kk13=0.4

param kk13_p=2.3

param kk13_pp=35.0

param kk24=5.5

param kk24_p=35.0

param kk34=2.0

param kkcdh=0.0

param kkcdh_p=1.22

param kp21=40.0

param kp21_p=5.0

param kp31=2.6

param kp31_p=15.0

param kp42=3.8

param kp42_p=3.0

param kp43=0.6

param kp43_p=0.2

param kpcdh=0.035

param kpcdh_p=1.2

param kpp=0.1

param ks20=0.0

# When add Cdc20 back, ks20=0.015
param ks=0.0

param ksb2=0.03

param ksesp=0.0013

param kspds=0.03

param kspolo=0.01

param la1=300.0

param la2=10.0

param la3=1.0

param la4=1.0

param lamen=15.0

param lapds=500.0

param ld1=1.0

param ld2=0.2

param ld3=4.0

param ld4=5.0

param ldmen=0.1

param ldpds=1.0

param N=0.0

param NET1T=2.0

param PP2AT=1.0

param SCCRRDD=0.0

param TEM1T=1.0

param TEV=0.0

param tm=0.0


@ total=100.0,dt=1.0,t0=0.0,meth=stiff,maxstor=50000,njmp=1,toler=1.0E-4,bound=10000


done
